# Supplementary material for: Decrease in ACE2 mRNA expression in aged mouse lung
Source: bioRxiv or medRxiv preprint supplement (doi:10.1101/2020.04.02.021451), 2020-04-05
Supplement: Supplementary file [file media-1.pdf]

## Supplementary Figures

### Decrease in *ACE2* mRNA expression in aged mouse lung

A. Sina Boeshaghi<sup>1</sup> and Lior Pachter<sup>2,3,\*</sup>

1. Department of Mechanical Engineering, California Institute of Technology, Pasadena, CA,
  2. Division of Biology and Biological Engineering, California Institute of Technology, Pasadena, CA
  3. Department of Computing and Mathematical Sciences, California Institute of Technology, CA
- \*Address correspondence to [lpachter@caltech.edu](mailto:lpachter@caltech.edu)

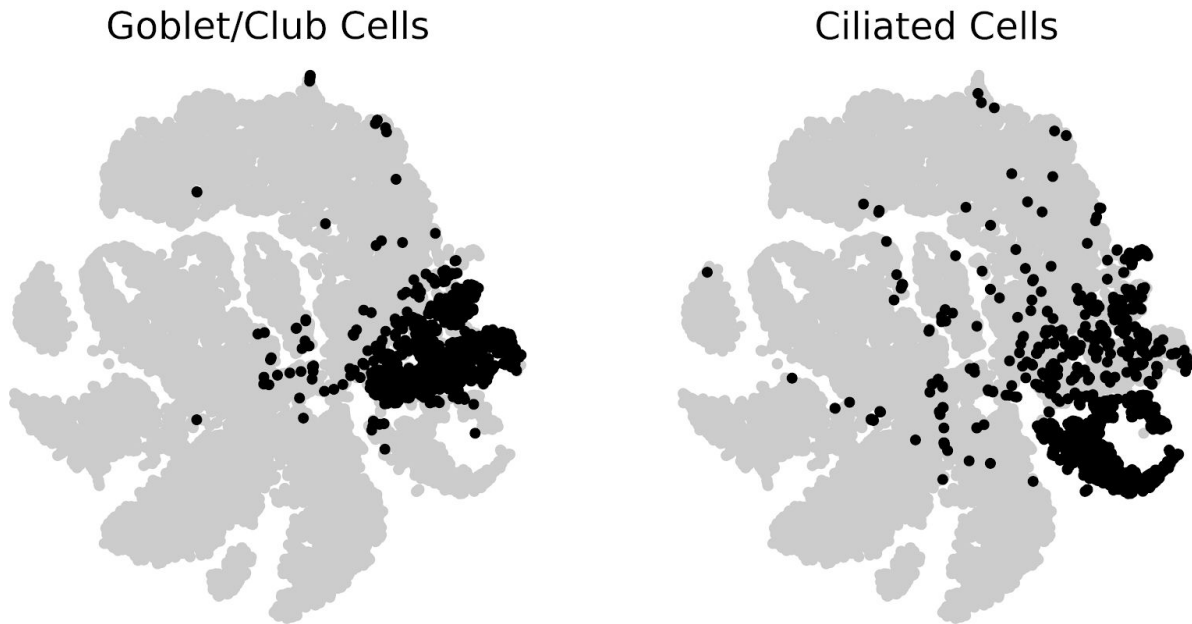

**Supplementary Figure 1:** t-distributed Stochastic Neighbor Embedding of 10 scVI components showing cell type in black.

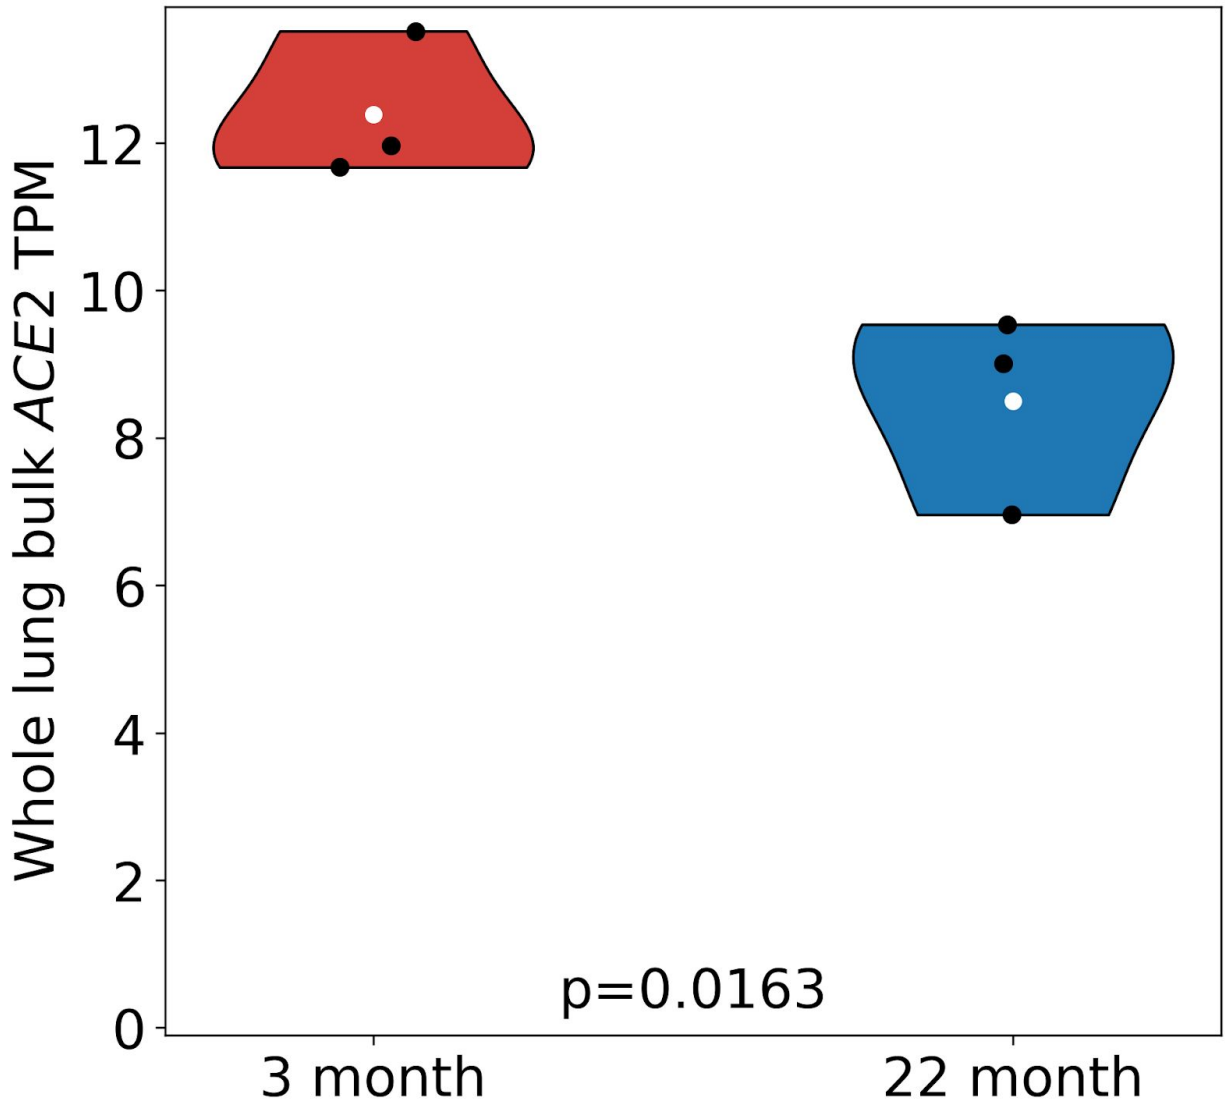

**Supplementary Figure 2:** Comparison of *ACE2* mRNA expression in 3-month old and 22-month old whole lung bulk RNA-seq.

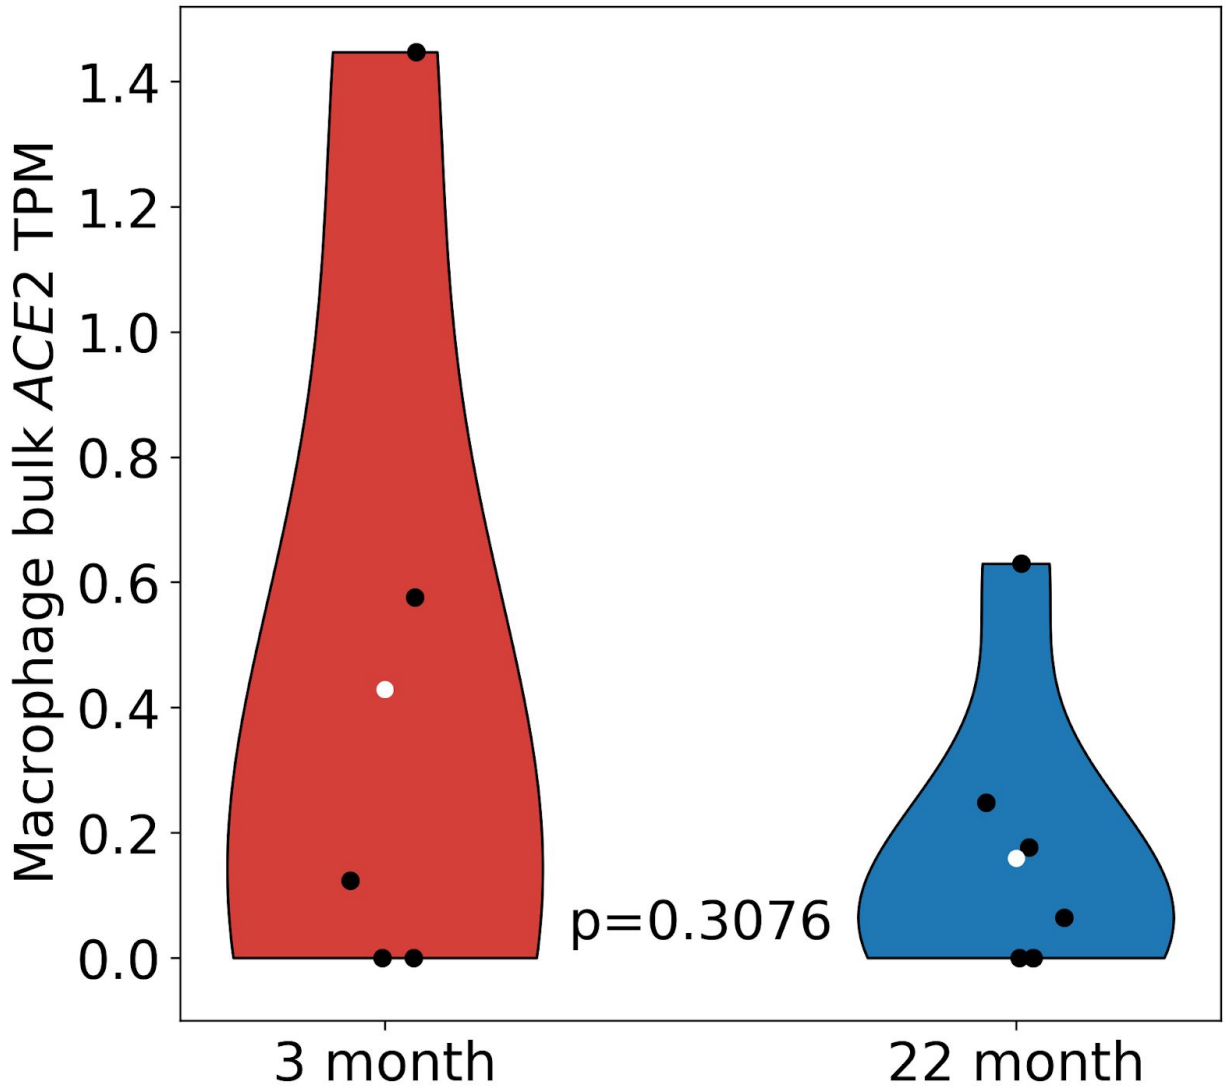

**Supplementary Figure 3:** Comparison of *ACE2* mRNA expression in 5 3-month old and 6 22-month old alveolar macrophage bulk RNA-seq.

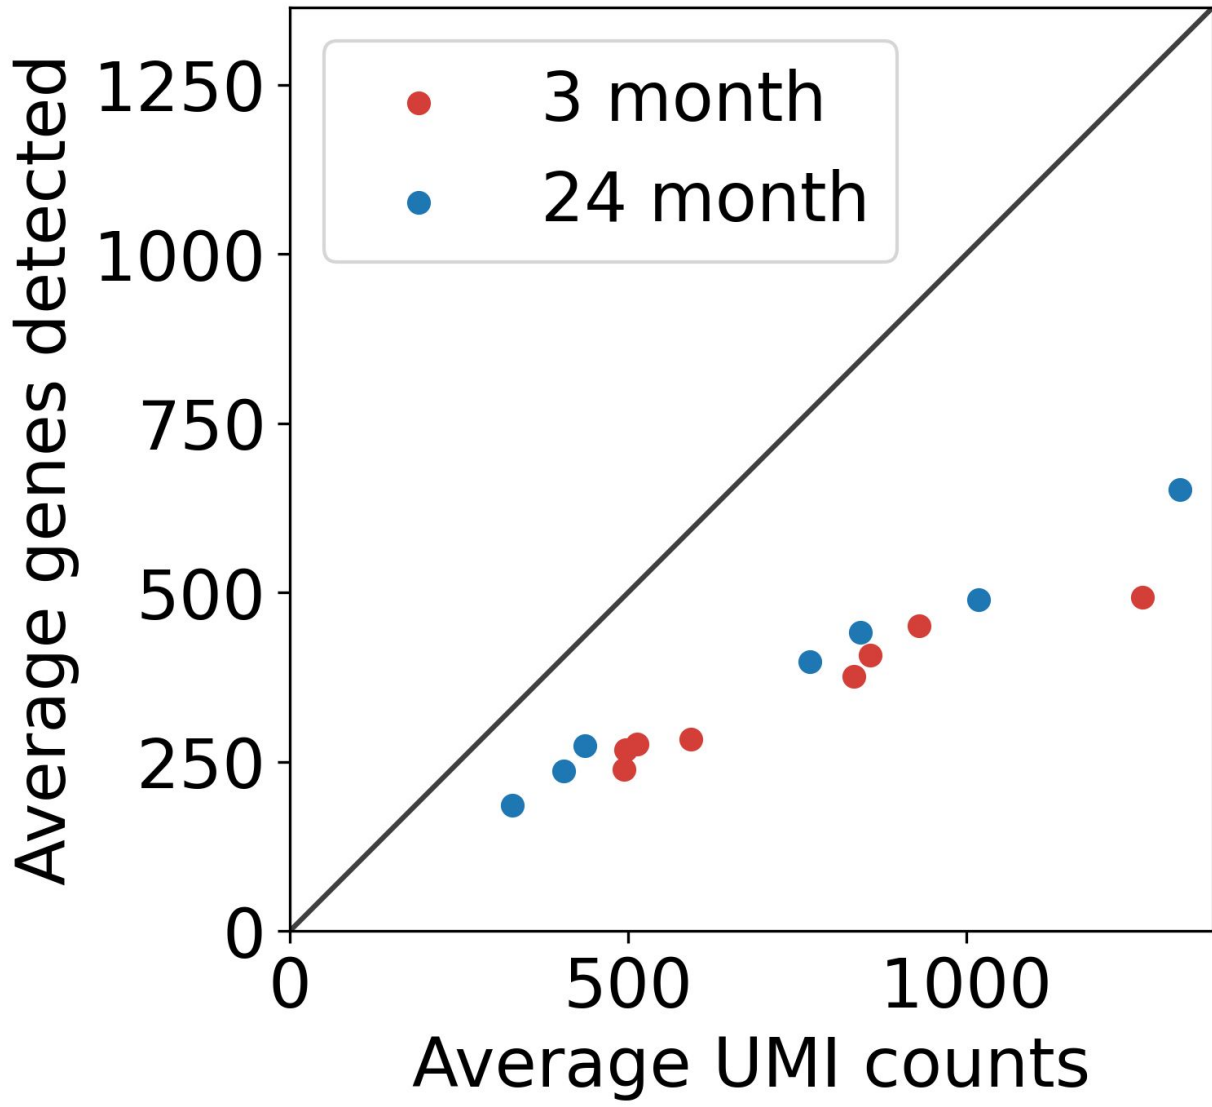

**Supplementary Figure 4:** Average number of UMIs and genes detected per cell colored by sample. There is no significant difference between 3-month old and 24-month old samples .

## *TMPRSS2* expression

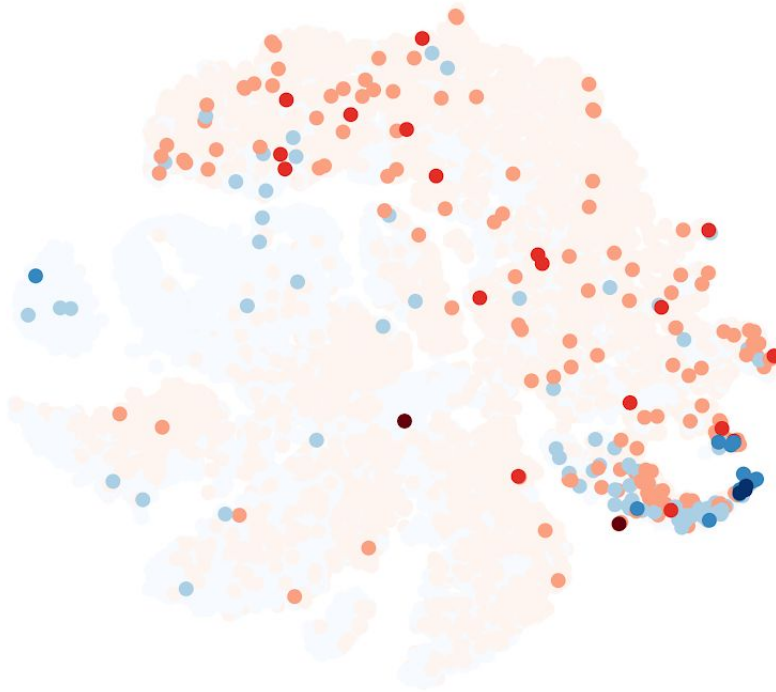

**Supplementary Figure 5:** t-distributed Stochastic Neighbor Embedding showing cells that express *TMPRSS2* (3-month old cells in red, 24-month old cells in blue).

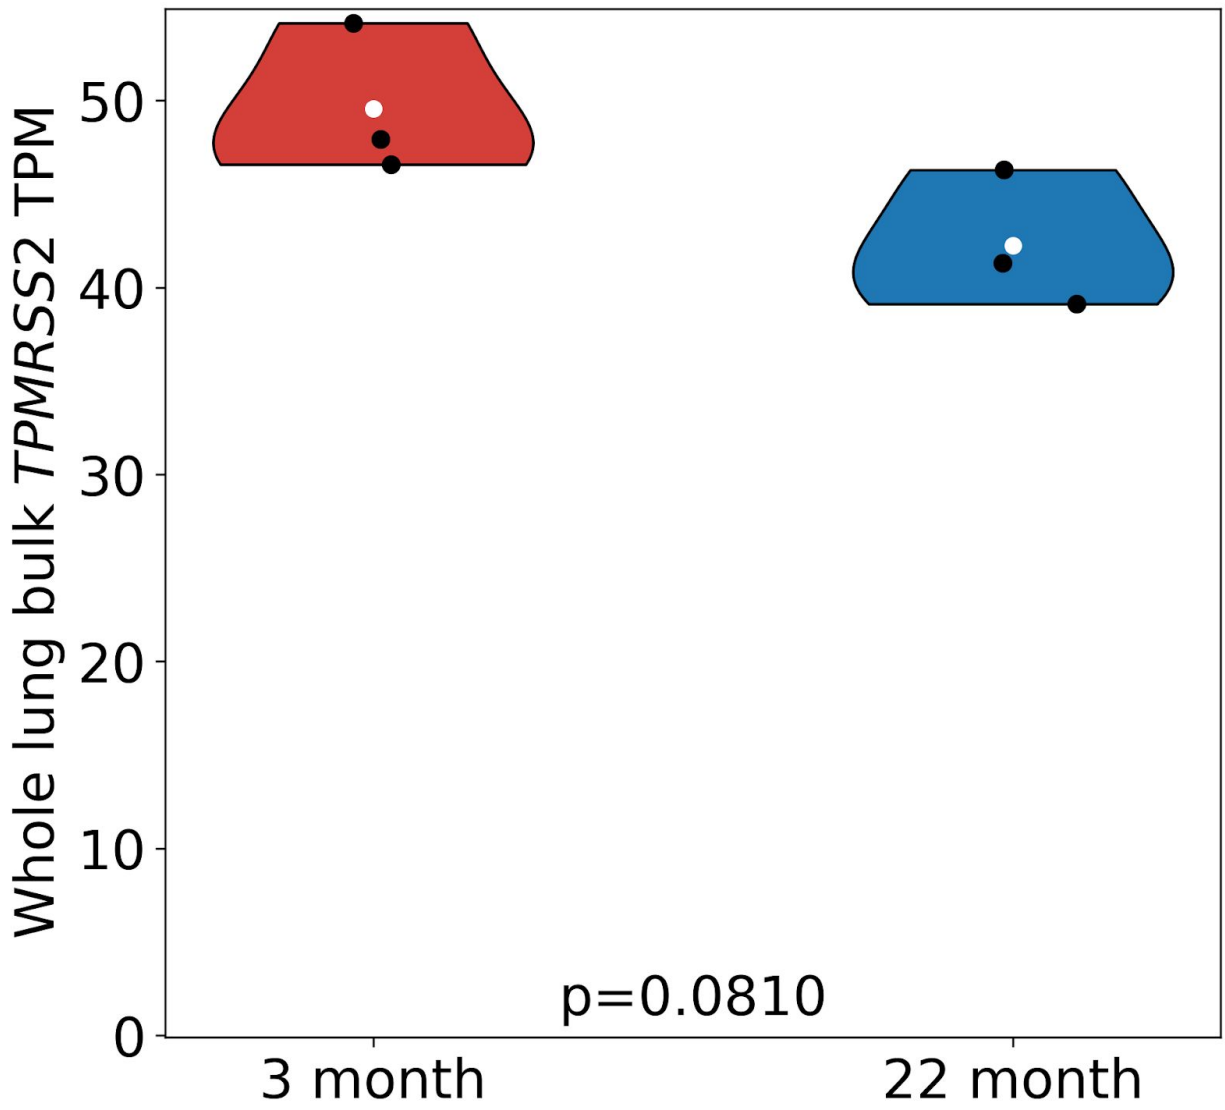

**Supplementary Figure 6:** Comparison of *TPMRSS2* mRNA expression in 3-month old and 22-month old whole lung bulk RNA-seq.

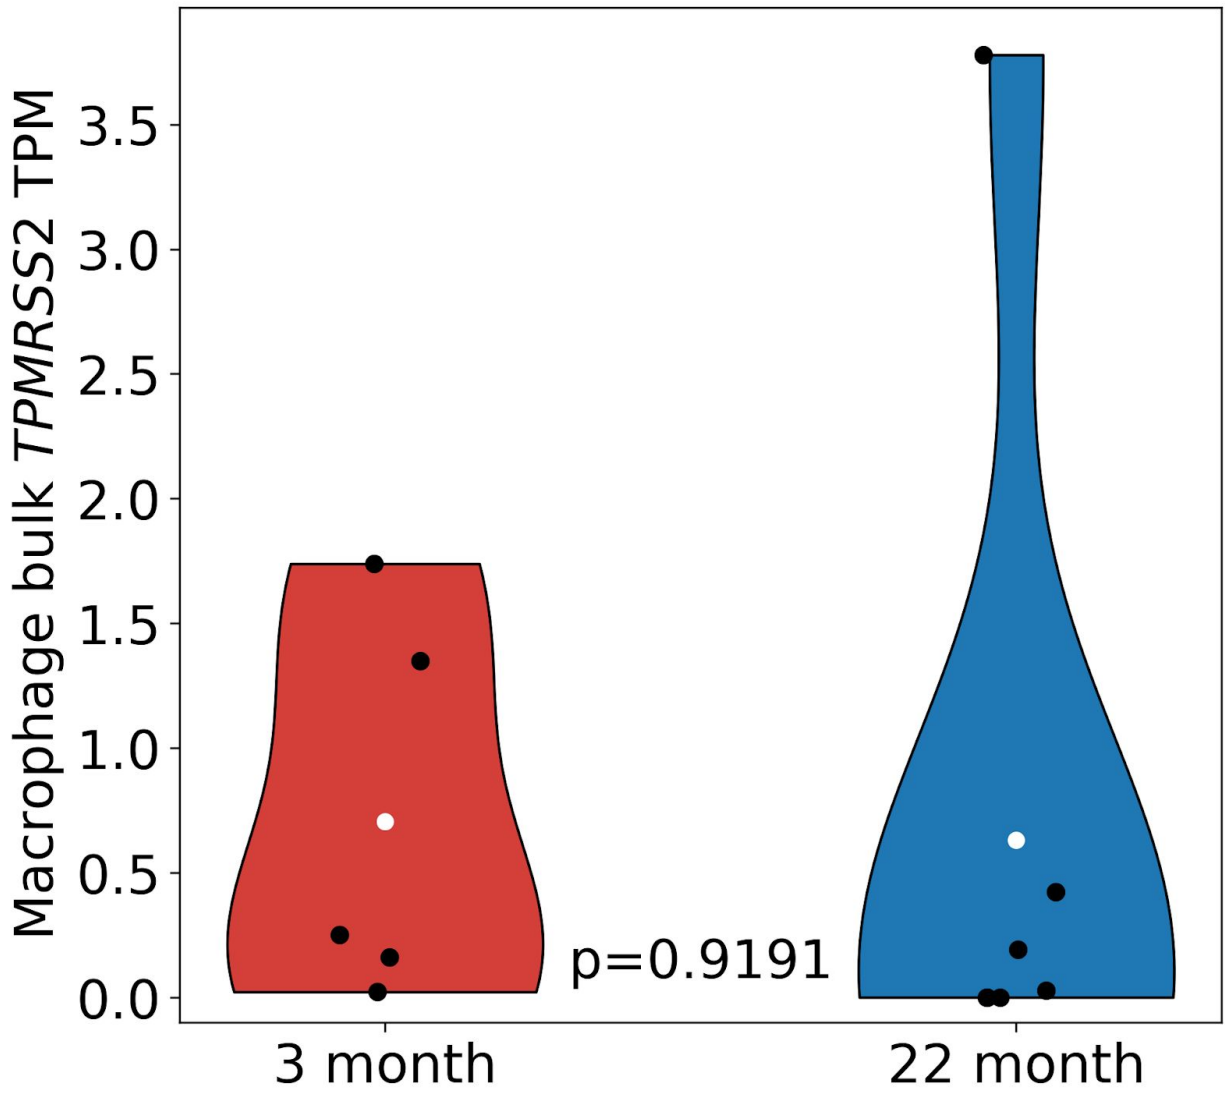

**Supplementary Figure 7:** Comparison of *TPMRSS2* mRNA expression in 5 3-month old and 6 22-month old alveolar macrophage bulk RNA-seq.

**Supplementary Table 1:** Claims that *ACE2* mRNA expression does not decrease with age.

| Dataset                                                  | Claim                                                                                                                                                                                                                                                                                                      | Refutation                                                                                                                                                                                                                                                                  |
|----------------------------------------------------------|------------------------------------------------------------------------------------------------------------------------------------------------------------------------------------------------------------------------------------------------------------------------------------------------------------|-----------------------------------------------------------------------------------------------------------------------------------------------------------------------------------------------------------------------------------------------------------------------------|
| GTEX <sup>1</sup>                                        | <p>Chen <i>et al</i>.<sup>2</sup>: “<i>ACE2</i> expression generally decreases with age significantly or insignificantly.”</p> <p>Smith and Sheltzer<sup>3</sup>: “<i>ACE2</i> expression [in GTEX] was equivalent between...young individuals (&lt;29 years) and elderly individuals (&gt;70 years).”</p> | Multiple confounders that are difficult to correct for; RNA from cadavers may be of degraded quality; despite these issues evidence of slight decrease in <i>ACE2</i> expression with age.                                                                                  |
| Rat BodyMap <sup>4</sup>                                 | Smith and Sheltzer <sup>3</sup> : “...young rats (6 weeks) and elderly rats (104 weeks) [displayed equivalent levels of <i>ACE2</i> expression in the lung]”                                                                                                                                               | Single-end 50bp bulk total RNA was quantified with Cufflinks v2.0.2 <sup>5</sup> (2012) which did not perform multiple rounds of EM for reads ambiguous between genes. <i>ACE2</i> is a member of a gene family. Furthermore, the Ribo-zero requires careful normalization. |
| Bulk RNA-seq from mice alveolar macrophages <sup>6</sup> | We find that 22-month samples have increased expression of <i>ACE2</i> on average (0.47 fold change young/old p=0.1198). (Methods)                                                                                                                                                                         | Increased <i>ACE2</i> expression in 24-month lung in FACS sorted bulk Epithelium (Club/Ciliated) is partly explained by different proportions of club/goblet cells to ciliated cells in comparison with proportions from single-cell RNA-seq (Figure 1c).                   |

## References



1. GTEx Consortium. The Genotype-Tissue Expression (GTEx) project. *Nat. Genet.* **45**, 580–585 (2013).
2. Chen, J. *et al.* Individual Variation of the SARS-CoV2 Receptor ACE2 Gene Expression and Regulation. (2020).
3. Smith, J. C. & Sheltzer, J. M. Cigarette smoke triggers the expansion of a subpopulation of respiratory epithelial cells that express the SARS-CoV-2 receptor ACE2. *bioRxiv* (2020).
4. Yu, Y. *et al.* A rat RNA-Seq transcriptomic BodyMap across 11 organs and 4 developmental stages. *Nat. Commun.* **5**, 3230 (2014).
5. Trapnell, C. *et al.* Transcript assembly and quantification by RNA-Seq reveals unannotated transcripts and isoform switching during cell differentiation. *Nat. Biotechnol.* **28**, 511–515 (2010).
6. Angelidis, I. *et al.* An atlas of the aging lung mapped by single cell transcriptomics and deep tissue proteomics. *Nat. Commun.* **10**, 963 (2019).
